# Supplementary material
Source: MDPI journal article supplement (https://www.mdpi.com/2313-5778/4/3/86)
Supplement: s1 [file s1]

## **Supplementary Materials:**

### Rio Bravo/Grande

The river that separates the US Texas Mexican border has two names. From the Mexican side, it was named and called the Rio Bravo del Norte and from the US side, it is called the Rio Grande. Historically it has had many names. See

[https://www.newworldencyclopedia.org/entry/Rio\\_Grande](https://www.newworldencyclopedia.org/entry/Rio_Grande)

van Humboldt Interactive Map:

[https://s3.glo.texas.gov/glo/history/archives/map-store/zoomer.cfm?z=https://s3.glo.texas.gov/ncu/SCANDOCS/archives\\_webfiles/arcmeps/ZoomWork/9/3/93421](https://s3.glo.texas.gov/glo/history/archives/map-store/zoomer.cfm?z=https://s3.glo.texas.gov/ncu/SCANDOCS/archives_webfiles/arcmeps/ZoomWork/9/3/93421)

Children of the Revolución, PBS

<https://www.pbs.org/show/children-revolucion/>

Land Grants

<https://tshaonline.org/handbook/online/articles/mpl01>

**Conflicts of Interest:** “The author declares no conflict of interest.”
